# Supplementary material for: On the unfounded enthusiasm for soft selective sweeps II: Examining recent evidence from humans, flies, and viruses
Source: PLoS Genet. 2018 Dec 28;14(12):e1007859. doi: 10.1371/journal.pgen.1007859 (PMC6336318; doi:10.1371/journal.pgen.1007859)
Supplement: S1 Table — (XLSX) [file pgen.1007859.s005.xlsx]

## Sheet: Sheet1
log_Ne_Ame_bn		log_Ne_Eur_bn		log_time_admixture		log_time_split_AfrEur		Ne		Ne_anc		Ne_Ame		Ne_Eur		proportion_admixture		log_severity		time_crash
param	density	param	density	param	density	param	density	param	density	param	density	param	density	param	density	param	density	param	density	param	density
2.00001	0.0927586	2	6.56015e-10	2.00001	0.247771	4.00001	0.000259385	100002	2.99721e-10	100000	1.89624e-09	10015	1.96184e-08	10006.1	5.49402e-08	0.010001	1.65466e-13	-2	8.17455e-76	1004.22	2.03524e-09
2.01509	0.0970306	2.01508	9.05466e-10	2.00956	0.255769	4.01509	0.000313013	149751	3.4702e-10	149749	2.09721e-09	160718	2.01151e-08	60207.1	5.66827e-08	0.0149256	2.41609e-13	-1.9799	3.05259e-74	21099.7	2.32676e-09
2.03016	0.101411	2.03015	1.24533e-09	2.01911	0.263794	4.03016	0.00037682	199499	4.01077e-10	199497	2.31651e-09	311421	2.06086e-08	110408	5.84306e-08	0.0198502	3.51774e-13	-1.9598	1.09592e-72	41195.1	2.65457e-09
2.04524	0.105898	2.04523	1.70666e-09	2.02865	0.271836	4.04524	0.000452563	249248	4.62739e-10	249246	2.55547e-09	462124	2.1098e-08	160609	6.01818e-08	0.0247748	5.10697e-13	-1.9397	3.78271e-71	61290.6	3.02238e-09
2.06031	0.110489	2.0603	2.33061e-09	2.0382	0.279884	4.06031	0.000542275	298996	5.32943e-10	298994	2.81548e-09	612827	2.1583e-08	210810	6.19339e-08	0.0296995	7.39289e-13	-1.9196	1.25527e-69	81386	3.43413e-09
2.07539	0.115183	2.07538	3.17141e-09	2.04775	0.287928	4.07539	0.000648298	348745	6.12722e-10	348743	3.09801e-09	763530	2.20629e-08	261011	6.36846e-08	0.0346241	1.06714e-12	-1.8995	4.00489e-68	101482	3.89406e-09
2.09046	0.119977	2.09045	4.30027e-09	2.0573	0.295955	4.09046	0.000773328	398494	7.03209e-10	398492	3.40457e-09	914233	2.25371e-08	311212	6.54314e-08	0.0395487	1.53599e-12	-1.8794	1.22846e-66	121577	4.40666e-09
2.10554	0.124867	2.10553	5.81039e-09	2.06684	0.303956	4.10554	0.000920462	448242	8.05646e-10	448240	3.73673e-09	1064940	2.30052e-08	361413	6.71722e-08	0.0444733	2.20454e-12	-1.8593	3.62286e-65	141672	4.97671e-09
2.12061	0.129852	2.1206	7.82316e-09	2.07639	0.31192	4.12061	0.00109325	497991	9.21392e-10	497989	4.09613e-09	1215640	2.34667e-08	411614	6.89044e-08	0.0493979	3.15512e-12	-1.8392	1.02723e-63	161768	5.60925e-09
2.13569	0.134927	2.13568	1.04962e-08	2.08594	0.319835	4.13569	0.00129574	547739	1.05193e-09	547737	4.48444e-09	1366340	2.3921e-08	461815	7.06258e-08	0.0543225	4.50283e-12	-1.8191	2.80035e-62	181863	6.30958e-09
2.15076	0.140091	2.15075	1.40332e-08	2.09549	0.327693	4.15076	0.00153258	597488	1.19886e-09	597486	4.90341e-09	1517040	2.43678e-08	512016	7.23342e-08	0.0592471	6.40811e-12	-1.799	7.33987e-61	201959	7.08327e-09
2.16584	0.145338	2.16583	1.86964e-08	2.10503	0.335483	4.16584	0.00180903	647236	1.36394e-09	647234	5.35482e-09	1667750	2.48067e-08	562217	7.40273e-08	0.0641717	9.09399e-12	-1.77889	1.84969e-59	222054	7.93612e-09
2.18091	0.150667	2.1809	2.48225e-08	2.11458	0.343194	4.18091	0.00213109	696985	1.54905e-09	696983	5.84049e-09	1818450	2.52373e-08	612418	7.57029e-08	0.0690964	1.28695e-11	-1.75879	4.48175e-58	242150	8.87418e-09
2.19599	0.156073	2.19598	3.28411e-08	2.12413	0.350818	4.19599	0.00250556	746734	1.75623e-09	746732	6.36229e-09	1969150	2.56593e-08	662619	7.73589e-08	0.074021	1.81619e-11	-1.73869	1.04409e-56	262245	9.90371e-09
2.21106	0.161552	2.21105	4.32996e-08	2.13368	0.358345	4.21106	0.00294011	796482	1.98766e-09	796480	6.92211e-09	2119860	2.60722e-08	712820	7.89931e-08	0.0789456	2.55594e-11	-1.71859	2.33872e-55	282341	1.10312e-08
2.22614	0.1671	2.22613	5.68915e-08	2.14322	0.365766	4.22614	0.00344342	846231	2.2457e-09	846229	7.52189e-09	2270560	2.6476e-08	763021	8.06037e-08	0.0838702	3.58706e-11	-1.69849	5.03694e-54	302436	1.22633e-08
2.24121	0.172714	2.2412	7.44926e-08	2.15277	0.373075	4.24122	0.00402527	895979	2.53285e-09	895978	8.16356e-09	2421260	2.68703e-08	813222	8.21886e-08	0.0887948	5.02029e-11	-1.67839	1.04307e-52	322532	1.36067e-08
2.25629	0.178389	2.25628	9.72047e-08	2.16232	0.380261	4.25629	0.0046966	945728	2.85178e-09	945726	8.84908e-09	2571960	2.72549e-08	863423	8.37461e-08	0.0937194	7.00689e-11	-1.65829	2.07691e-51	342627	1.50684e-08
2.27136	0.18412	2.27135	1.26408e-07	2.17187	0.387319	4.27137	0.00546972	995476	3.20534e-09	995475	9.58043e-09	2722670	2.76296e-08	913624	8.52743e-08	0.098644	9.75291e-11	-1.63819	3.97639e-50	362722	1.66554e-08
2.28644	0.189904	2.28643	1.63827e-07	2.18142	0.394241	4.28644	0.00635835	1045230	3.59652e-09	1045220	1.03596e-08	2873370	2.79944e-08	963825	8.67716e-08	0.103569	1.35382e-10	-1.61809	7.32034e-49	382818	1.83747e-08
2.30151	0.195737	2.30151	2.11605e-07	2.19096	0.401022	4.30152	0.00737778	1094970	4.02852e-09	1094970	1.11884e-08	3024070	2.8349e-08	1014030	8.82365e-08	0.108493	1.87416e-10	-1.59799	1.29584e-47	402913	2.02334e-08
2.31659	0.201613	2.31658	2.72396e-07	2.20051	0.407655	4.31659	0.008545	1144720	4.50466e-09	1144720	1.2069e-08	3174780	2.86935e-08	1064230	8.96674e-08	0.113418	2.5875e-10	-1.57789	2.20572e-46	423009	2.22384e-08
2.33166	0.207528	2.33166	3.49479e-07	2.21006	0.414136	4.33167	0.00987883	1194470	5.02846e-09	1194470	1.30031e-08	3325480	2.90278e-08	1114430	9.10631e-08	0.118342	3.56275e-10	-1.55779	3.61028e-45	443104	2.43968e-08
2.34674	0.213478	2.34673	4.46883e-07	2.21961	0.42046	4.34674	0.0114001	1244220	5.60357e-09	1244220	1.39926e-08	3476180	2.93519e-08	1164630	9.24223e-08	0.123267	4.89247e-10	-1.53769	5.68234e-44	463200	2.67152e-08
2.36181	0.219459	2.36181	5.69547e-07	2.22915	0.426623	4.36182	0.0131316	1293970	6.23381e-09	1293970	1.50394e-08	3626890	2.96657e-08	1214830	9.37438e-08	0.128192	6.70059e-10	-1.51759	8.60032e-43	483295	2.92004e-08
2.37689	0.225466	2.37688	7.235e-07	2.2387	0.432623	4.37689	0.0150986	1343720	6.92311e-09	1343710	1.61452e-08	3777590	2.99695e-08	1265030	9.50266e-08	0.133116	9.15261e-10	-1.49749	1.25174e-41	503391	3.18587e-08
2.39196	0.231494	2.39196	9.16076e-07	2.24825	0.438456	4.39197	0.0173284	1393470	7.67558e-09	1393460	1.73116e-08	3928290	3.02631e-08	1315230	9.62699e-08	0.138041	1.2469e-09	-1.47739	1.75197e-40	523486	3.46962e-08
2.40704	0.237539	2.40703	1.15616e-06	2.2578	0.444121	4.40704	0.0198511	1443210	8.49539e-09	1443210	1.85403e-08	4078990	3.05468e-08	1365430	9.74728e-08	0.142966	1.69423e-09	-1.45729	2.35813e-39	543582	3.77186e-08
2.42211	0.243597	2.42211	1.45451e-06	2.26734	0.449616	4.42212	0.0226991	1492960	9.38686e-09	1492960	1.98327e-08	4229700	3.08207e-08	1415630	9.86346e-08	0.14789	2.29605e-09	-1.43719	3.05241e-38	563677	4.09313e-08
2.43719	0.249663	2.43718	1.82403e-06	2.27689	0.454941	4.43719	0.0259077	1542710	1.03544e-08	1542710	2.11902e-08	4380400	3.10849e-08	1465830	9.97549e-08	0.152815	3.10354e-09	-1.41709	3.79981e-37	583772	4.43391e-08
2.45227	0.255733	2.45226	2.28026e-06	2.28644	0.460096	4.45227	0.0295148	1592460	1.14023e-08	1592460	2.26142e-08	4531100	3.13396e-08	1516040	1.00833e-07	0.157739	4.18417e-09	-1.39698	4.54918e-36	603868	4.79465e-08
2.46734	0.261803	2.46733	2.84177e-06	2.29599	0.465081	4.46735	0.0335611	1642210	1.25353e-08	1642210	2.41056e-08	4681810	3.1585e-08	1566240	1.01869e-07	0.162664	5.62654e-09	-1.37688	5.23802e-35	623963	5.17572e-08
2.48242	0.267868	2.48241	3.53068e-06	2.30553	0.469897	4.48242	0.0380899	1691960	1.37576e-08	1691960	2.56656e-08	4832510	3.18214e-08	1616440	1.02862e-07	0.167589	7.54676e-09	-1.35678	5.80063e-34	644059	5.57745e-08
2.49749	0.273925	2.49748	4.37332e-06	2.31508	0.474546	4.4975	0.0431477	1741710	1.50739e-08	1741700	2.72948e-08	4983210	3.20489e-08	1666640	1.03813e-07	0.172513	1.00965e-08	-1.33668	6.1783e-33	664154	6.00008e-08
2.51257	0.27997	2.51256	5.40092e-06	2.32463	0.47903	4.51257	0.0487833	1791450	1.64886e-08	1791450	2.8994e-08	5133920	3.22678e-08	1716840	1.04721e-07	0.177438	1.34735e-08	-1.31658	6.32935e-32	684250	6.44379e-08
2.52764	0.285997	2.52763	6.65036e-06	2.33418	0.483352	4.52765	0.0550483	1841200	1.80061e-08	1841200	3.07637e-08	5284620	3.24783e-08	1767040	1.05586e-07	0.182362	1.79346e-08	-1.29648	6.23677e-31	704345	6.90871e-08
2.54272	0.292005	2.54271	8.16516e-06	2.34372	0.487515	4.54272	0.0619967	1890950	1.96305e-08	1890950	3.26041e-08	5435320	3.26809e-08	1817240	1.06409e-07	0.187287	2.3813e-08	-1.27638	5.9113e-30	724441	7.39484e-08
2.55779	0.297988	2.55779	9.99653e-06	2.35327	0.491522	4.5578	0.0696848	1940700	2.1366e-08	1940700	3.45153e-08	5586020	3.28756e-08	1867440	1.0719e-07	0.192212	3.15393e-08	-1.25628	5.38944e-29	744536	7.90214e-08
2.57287	0.303943	2.57286	1.22045e-05	2.36282	0.495378	4.57287	0.0781707	1990450	2.32166e-08	1990450	3.64972e-08	5736730	3.30629e-08	1917640	1.07929e-07	0.197136	4.16689e-08	-1.23618	4.72668e-28	764632	8.43046e-08
2.58794	0.309866	2.58794	1.48595e-05	2.37237	0.499087	4.58795	0.0875144	2040200	2.5186e-08	2040200	3.85495e-08	5887430	3.32431e-08	1967840	1.08626e-07	0.202061	5.49159e-08	-1.21608	3.98783e-27	784727	8.9796e-08
2.60302	0.315754	2.60301	1.80437e-05	2.38192	0.502654	4.60302	0.0977768	2089950	2.72775e-08	2089940	4.06715e-08	6038130	3.34164e-08	2018040	1.09284e-07	0.206986	7.21969e-08	-1.19598	3.23669e-26	804822	9.54922e-08
2.61809	0.321604	2.61809	2.18531e-05	2.39146	0.506084	4.6181	0.10902	2139690	2.94943e-08	2139690	4.28625e-08	6188840	3.35831e-08	2068250	1.09901e-07	0.21191	9.46844e-08	-1.17588	2.52737e-25	824918	1.01389e-07
2.63317	0.327411	2.63316	2.63992e-05	2.40101	0.509381	4.63317	0.121305	2189440	3.18393e-08	2189440	4.51215e-08	6339540	3.37437e-08	2118450	1.10479e-07	0.216835	1.23875e-07	-1.15578	1.8987e-24	845013	1.07483e-07
2.64824	0.333173	2.64824	3.18122e-05	2.41056	0.512553	4.64825	0.134695	2239190	3.43148e-08	2239190	4.74471e-08	6490240	3.38983e-08	2168650	1.11018e-07	0.221759	1.61674e-07	-1.13568	1.37241e-23	865109	1.13766e-07
2.66332	0.338886	2.66331	3.82427e-05	2.42011	0.515604	4.66332	0.14925	2288940	3.69229e-08	2288940	4.98378e-08	6640940	3.40474e-08	2218850	1.1152e-07	0.226684	2.10502e-07	-1.11558	9.5449e-23	885204	1.20233e-07
2.67839	0.344548	2.67839	4.58659e-05	2.42965	0.51854	4.6784	0.165027	2338690	3.9665e-08	2338690	5.2292e-08	6791650	3.41912e-08	2269050	1.11985e-07	0.231609	2.73423e-07	-1.09548	6.38766e-22	905300	1.26877e-07
2.69347	0.350154	2.69346	5.48844e-05	2.4392	0.521368	4.69348	0.182084	2388440	4.25421e-08	2388440	5.48074e-08	6942350	3.43301e-08	2319250	1.12414e-07	0.236533	3.54311e-07	-1.07538	4.11356e-21	925395	1.33688e-07
2.70854	0.355702	2.70854	6.55332e-05	2.44875	0.524094	4.70855	0.200471	2438190	4.55548e-08	2438180	5.73819e-08	7093050	3.44643e-08	2369450	1.12808e-07	0.241458	4.58048e-07	-1.05528	2.54931e-20	945491	1.40659e-07
2.72362	0.361189	2.72361	7.80838e-05	2.4583	0.526723	4.72363	0.220237	2487930	4.87029e-08	2487930	6.00129e-08	7243760	3.45942e-08	2419650	1.13168e-07	0.246382	5.90772e-07	-1.03518	1.52048e-19	965586	1.47779e-07
2.73869	0.366612	2.73869	9.28503e-05	2.46784	0.529263	4.7387	0.241422	2537680	5.19857e-08	2537680	6.26977e-08	7394460	3.47201e-08	2469850	1.13496e-07	0.251307	7.60182e-07	-1.01508	8.72816e-19	985682	1.55038e-07
2.75377	0.371967	2.75376	0.000110196	2.47739	0.531719	4.75378	0.264062	2587430	5.54019e-08	2587430	6.54333e-08	7545160	3.48422e-08	2520050	1.13792e-07	0.256232	9.75912e-07	-0.994975	4.82251e-18	1005780	1.62425e-07
2.76884	0.377253	2.76884	0.00013054	2.48694	0.534096	4.76885	0.288183	2637180	5.89493e-08	2637180	6.82164e-08	7695860	3.49608e-08	2570260	1.14058e-07	0.261156	1.24999e-06	-0.974874	2.56486e-17	1025870	1.69929e-07
2.78392	0.382466	2.78391	0.000154366	2.49649	0.536402	4.78393	0.313803	2686930	6.26253e-08	2686930	7.10436e-08	7846570	3.50763e-08	2620460	1.14295e-07	0.266081	1.59738e-06	-0.954774	1.31318e-16	1045970	1.77538e-07
2.79899	0.387603	2.79899	0.000182233	2.50603	0.538642	4.799	0.340929	2736680	6.64264e-08	2736680	7.39111e-08	7997270	3.51888e-08	2670660	1.14503e-07	0.271005	2.03669e-06	-0.934673	6.4727e-16	1066060	1.85239e-07
2.81407	0.392662	2.81406	0.000214787	2.51558	0.540822	4.81408	0.369559	2786430	7.03486e-08	2786420	7.68151e-08	8147970	3.52987e-08	2720860	1.14685e-07	0.27593	2.59098e-06	-0.914573	3.07174e-15	1086160	1.93021e-07
2.82914	0.397639	2.82914	0.000252771	2.52513	0.542947	4.82915	0.399675	2836170	7.43868e-08	2836170	7.97515e-08	8298680	3.54061e-08	2771060	1.14841e-07	0.280855	3.28874e-06	-0.894472	1.40365e-14	1106250	2.00869e-07
2.84422	0.402533	2.84422	0.000297043	2.53468	0.545022	4.84423	0.431248	2885920	7.85356e-08	2885920	8.27161e-08	8449380	3.55113e-08	2821260	1.14972e-07	0.285779	4.16512e-06	-0.874372	6.17646e-14	1126350	2.08772e-07
2.8593	0.407339	2.85929	0.000348591	2.54423	0.547053	4.8593	0.464234	2935670	8.27885e-08	2935670	8.57043e-08	8600080	3.56145e-08	2871460	1.1508e-07	0.290704	5.2634e-06	-0.854271	2.61741e-13	1146450	2.16716e-07
2.87437	0.412057	2.87437	0.000408552	2.55377	0.549044	4.87438	0.498575	2985420	8.71386e-08	2985420	8.87117e-08	8750780	3.5716e-08	2921660	1.15167e-07	0.295629	6.63669e-06	-0.834171	1.0683e-12	1166540	2.24689e-07
2.88945	0.416681	2.88944	0.000478238	2.56332	0.551	4.88945	0.534196	3035170	9.1578e-08	3035170	9.17334e-08	8901490	3.58158e-08	2971860	1.15232e-07	0.300553	8.35006e-06	-0.81407	4.20002e-12	1186640	2.32678e-07
2.90452	0.421211	2.90452	0.000559153	2.57287	0.552925	4.90453	0.571006	3084920	9.60982e-08	3084920	9.47647e-08	9052190	3.59142e-08	3022060	1.15278e-07	0.305478	1.0483e-05	-0.79397	1.59069e-11	1206730	2.4067e-07
2.9196	0.425643	2.91959	0.000653027	2.58242	0.554822	4.9196	0.608898	3134670	1.0069e-07	3134660	9.78006e-08	9202890	3.60114e-08	3072270	1.15306e-07	0.310402	1.31326e-05	-0.773869	5.80427e-11	1226830	2.48653e-07
2.93467	0.429974	2.93467	0.000761845	2.59196	0.556695	4.93468	0.647748	3184410	1.05345e-07	3184410	1.00836e-07	9353600	3.61074e-08	3122470	1.15316e-07	0.315327	1.64166e-05	-0.753769	2.04072e-10	1246920	2.56615e-07
2.94975	0.434203	2.94974	0.000887883	2.60151	0.558548	4.94976	0.687414	3234160	1.10051e-07	3234160	1.03866e-07	9504300	3.62024e-08	3172670	1.1531e-07	0.320252	2.04784e-05	-0.733668	6.91427e-10	1267020	2.64545e-07
2.96482	0.438325	2.96482	0.00103374	2.61106	0.560383	4.96483	0.727742	3283910	1.14798e-07	3283910	1.06885e-07	9655000	3.62966e-08	3222870	1.1529e-07	0.325176	2.54914e-05	-0.713568	2.25782e-09	1287110	2.72432e-07
2.9799	0.442339	2.97989	0.0012024	2.62061	0.562203	4.97991	0.768557	3333660	1.19574e-07	3333660	1.09889e-07	9805710	3.63899e-08	3273070	1.15256e-07	0.330101	3.16652e-05	-0.693467	7.10669e-09	1307210	2.80266e-07
2.99497	0.446241	2.99497	0.00139724	2.63015	0.564009	4.99498	0.809673	3383410	1.24369e-07	3383410	1.12871e-07	9956410	3.64826e-08	3323270	1.15208e-07	0.335025	3.92524e-05	-0.673367	2.15646e-08	1327300	2.88037e-07
3.01005	0.450029	3.01004	0.00162214	2.6397	0.565804	5.01006	0.850888	3433160	1.29169e-07	3433160	1.15827e-07	10107100	3.65746e-08	3373470	1.1515e-07	0.33995	4.85573e-05	-0.653266	6.30915e-08	1347400	2.95737e-07
3.02512	0.453701	3.02512	0.00188148	2.64925	0.567589	5.02513	0.891991	3482910	1.33963e-07	3482900	1.18753e-07	10257800	3.6666e-08	3423670	1.15081e-07	0.344875	5.99447e-05	-0.633166	1.78001e-07	1367500	3.03357e-07
3.0402	0.457254	3.04019	0.00218022	2.6588	0.569365	5.04021	0.932756	3532650	1.38737e-07	3532650	1.21642e-07	10408500	3.67568e-08	3473870	1.15002e-07	0.349799	7.38519e-05	-0.613065	4.84357e-07	1387590	3.1089e-07
3.05527	0.460684	3.05527	0.00252401	2.66834	0.571133	5.05528	0.972952	3582400	1.43479e-07	3582400	1.24489e-07	10559200	3.68471e-08	3524070	1.14915e-07	0.354724	9.08016e-05	-0.592965	1.27136e-06	1407690	3.1833e-07
3.07035	0.463991	3.07034	0.00291919	2.67789	0.572894	5.07036	1.01234	3632150	1.48177e-07	3632150	1.27291e-07	10709900	3.69369e-08	3574280	1.1482e-07	0.359649	0.000111417	-0.572864	3.21968e-06	1427780	3.2567e-07
3.08542	0.46717	3.08542	0.0033729	2.68744	0.574646	5.08543	1.05067	3681900	1.52816e-07	3681900	1.30042e-07	10860600	3.70261e-08	3624480	1.14718e-07	0.364573	0.00013644	-0.552764	7.86818e-06	1447880	3.32906e-07
3.1005	0.47022	3.1005	0.00389318	2.69699	0.576391	5.10051	1.08771	3731650	1.57385e-07	3731650	1.32738e-07	11011300	3.71147e-08	3674680	1.14611e-07	0.369498	0.00016675	-0.532663	1.85585e-05	1467970	3.40034e-07
3.11557	0.473139	3.11557	0.00448898	2.70654	0.578128	5.11558	1.1232	3781400	1.6187e-07	3781400	1.35374e-07	11162000	3.72028e-08	3724880	1.14498e-07	0.374422	0.000203393	-0.512563	4.22579e-05	1488070	3.4705e-07
3.13065	0.475924	3.13065	0.00517035	2.71608	0.579855	5.13066	1.1569	3831150	1.6626e-07	3831140	1.37946e-07	11312700	3.72901e-08	3775080	1.14382e-07	0.379347	0.0002476	-0.492462	9.29119e-05	1508160	3.53952e-07
3.14572	0.478572	3.14572	0.00594844	2.72563	0.581573	5.14573	1.18858	3880890	1.70541e-07	3880890	1.4045e-07	11463400	3.73767e-08	3825280	1.14262e-07	0.384272	0.000300828	-0.472362	0.000197305	1528260	3.60739e-07
3.1608	0.481082	3.1608	0.00683561	2.73518	0.583279	5.16081	1.21801	3930640	1.74702e-07	3930640	1.42882e-07	11614100	3.74625e-08	3875480	1.14139e-07	0.389196	0.000364789	-0.452261	0.000404784	1548350	3.67408e-07
3.17587	0.483452	3.17587	0.00784558	2.74473	0.584973	5.17589	1.24497	3980390	1.78733e-07	3980390	1.45239e-07	11764800	3.75473e-08	3925680	1.14015e-07	0.394121	0.000441494	-0.432161	0.000802514	1568450	3.73961e-07
3.19095	0.48568	3.19095	0.00899341	2.75427	0.586652	5.19096	1.26926	4030140	1.82621e-07	4030140	1.47517e-07	11915500	3.76311e-08	3975880	1.1389e-07	0.399045	0.000533302	-0.41206	0.00153802	1588550	3.80397e-07
3.20602	0.487764	3.20602	0.0102957	2.76382	0.588315	5.20604	1.2907	4079890	1.86356e-07	4079890	1.49713e-07	12066200	3.77138e-08	4026080	1.13763e-07	0.40397	0.000642969	-0.39196	0.00285035	1608640	3.86716e-07
3.2211	0.489702	3.2211	0.0117706	2.77337	0.58996	5.22111	1.30911	4129640	1.8993e-07	4129640	1.51824e-07	12217000	3.77952e-08	4076280	1.13637e-07	0.408895	0.000773711	-0.371859	0.00511002	1628740	3.92921e-07
3.23617	0.491494	3.23617	0.013438	2.78292	0.591586	5.23619	1.32435	4179390	1.93333e-07	4179380	1.53848e-07	12367700	3.78752e-08	4126490	1.13512e-07	0.413819	0.000929271	-0.351759	0.00886568	1648830	3.99013e-07
3.25125	0.493137	3.25125	0.0153193	2.79246	0.593189	5.25126	1.33631	4229130	1.96557e-07	4229130	1.55783e-07	12518400	3.79536e-08	4176690	1.13388e-07	0.418744	0.001114	-0.331658	0.0148922	1668930	4.04993e-07
3.26632	0.49463	3.26632	0.0174379	2.80201	0.594768	5.26634	1.34486	4278880	1.99594e-07	4278880	1.57625e-07	12669100	3.80304e-08	4226890	1.13265e-07	0.423669	0.00133293	-0.311558	0.0242309	1689020	4.10864e-07
3.2814	0.495973	3.2814	0.0198191	2.81156	0.59632	5.28141	1.34996	4328630	2.02438e-07	4328630	1.59374e-07	12819800	3.81053e-08	4277090	1.13144e-07	0.428593	0.00159188	-0.291457	0.0382099	1709120	4.16628e-07
3.29648	0.497165	3.29647	0.0224898	2.82111	0.597843	5.29649	1.35154	4378380	2.05083e-07	4378380	1.61028e-07	12970500	3.81781e-08	4327290	1.13026e-07	0.433518	0.00189759	-0.271357	0.0584283	1729210	4.22287e-07
3.31155	0.498204	3.31155	0.0254791	2.83065	0.599336	5.31156	1.3496	4428130	2.07525e-07	4428130	1.62586e-07	13121200	3.82488e-08	4377490	1.1291e-07	0.438442	0.00225776	-0.251256	0.0866925	1749310	4.27844e-07
3.32663	0.499091	3.32662	0.0288179	2.8402	0.600795	5.32664	1.34413	4477880	2.09759e-07	4477880	1.64047e-07	13271900	3.83172e-08	4427690	1.12798e-07	0.443367	0.00268129	-0.231156	0.124893	1769400	4.33301e-07
3.3417	0.499825	3.3417	0.0325389	2.84975	0.602219	5.34171	1.33517	4527630	2.11783e-07	4527620	1.6541e-07	13422600	3.8383e-08	4477890	1.12689e-07	0.448292	0.00317832	-0.211055	0.174827	1789500	4.3866e-07
3.35678	0.500406	3.35677	0.0366769	2.8593	0.603605	5.35679	1.32279	4577370	2.13594e-07	4577370	1.66675e-07	13573300	3.84461e-08	4528090	1.12584e-07	0.453216	0.00376046	-0.190955	0.237972	1809600	4.43921e-07
3.37185	0.500834	3.37185	0.0412683	2.86885	0.604953	5.37186	1.30708	4627120	2.15191e-07	4627120	1.67841e-07	13724000	3.85064e-08	4578290	1.12483e-07	0.458141	0.00444094	-0.170854	0.315243	1829690	4.49087e-07
3.38693	0.501109	3.38693	0.0463513	2.87839	0.606258	5.38694	1.28814	4676870	2.16575e-07	4676870	1.6891e-07	13874700	3.85636e-08	4628500	1.12386e-07	0.463065	0.0052348	-0.150754	0.406772	1849790	4.54158e-07
3.402	0.501233	3.402	0.0519656	2.88794	0.607521	5.40202	1.26613	4726620	2.17744e-07	4726620	1.69882e-07	14025400	3.86176e-08	4678700	1.12293e-07	0.46799	0.00615907	-0.130653	0.511737	1869880	4.59133e-07
3.41708	0.501205	3.41708	0.0581524	2.89749	0.60874	5.41709	1.2412	4776370	2.18701e-07	4776370	1.70756e-07	14176100	3.86683e-08	4728900	1.12205e-07	0.472915	0.00723303	-0.110553	0.628298	1889980	4.64012e-07
3.43215	0.501027	3.43215	0.064954	2.90704	0.609912	5.43217	1.21352	4826120	2.19449e-07	4826120	1.71535e-07	14326800	3.87155e-08	4779100	1.12121e-07	0.477839	0.00847842	-0.0904523	0.753645	1910070	4.68795e-07
3.44723	0.5007	3.44723	0.0724138	2.91658	0.611037	5.44724	1.18331	4875870	2.19989e-07	4875860	1.72219e-07	14477500	3.8759e-08	4829300	1.12042e-07	0.482764	0.00991969	-0.0703518	0.884179	1930170	4.73477e-07
3.4623	0.500224	3.4623	0.0805758	2.92613	0.612114	5.46232	1.15077	4925610	2.20327e-07	4925610	1.7281e-07	14628200	3.87988e-08	4879500	1.11968e-07	0.487688	0.0115843	-0.0502513	1.0158	1950260	4.78057e-07
3.47738	0.499602	3.47738	0.0894845	2.93568	0.613142	5.47739	1.11613	4975360	2.20465e-07	4975360	1.7331e-07	14778900	3.88346e-08	4929700	1.11898e-07	0.492613	0.0135028	-0.0301508	1.14427	1970360	4.82531e-07
3.49245	0.498835	3.49245	0.0991842	2.94523	0.614119	5.49247	1.07962	5025110	2.20411e-07	5025110	1.73719e-07	14929600	3.88664e-08	4979900	1.11832e-07	0.497538	0.0157096	-0.0100503	1.26562	1990450	4.86892e-07
3.50753	0.497925	3.50753	0.109719	2.95477	0.615046	5.50754	1.0415	5074860	2.20168e-07	5074860	1.74041e-07	15080300	3.8894e-08	5030100	1.11771e-07	0.502462	0.0182426	0.0100502	1.37648	2010550	4.91137e-07
3.5226	0.496875	3.5226	0.121133	2.96432	0.615923	5.52262	1.00201	5124610	2.19744e-07	5124610	1.74276e-07	15231000	3.89173e-08	5080300	1.11715e-07	0.507387	0.0211442	0.0301507	1.47437	2030650	4.95257e-07
3.53768	0.495685	3.53768	0.133467	2.97387	0.616749	5.53769	0.961409	5174360	2.19145e-07	5174360	1.74428e-07	15381700	3.89363e-08	5130510	1.11663e-07	0.512312	0.0244609	0.0502512	1.55785	2050740	4.99245e-07
3.55275	0.494359	3.55275	0.146761	2.98342	0.617524	5.55277	0.919942	5224110	2.18379e-07	5224100	1.74499e-07	15532400	3.89509e-08	5180710	1.11614e-07	0.517236	0.0282442	0.0703517	1.62653	2070840	5.03092e-07
3.56783	0.492898	3.56783	0.161055	2.99296	0.618249	5.56784	0.877862	5273850	2.17453e-07	5273850	1.74492e-07	15683100	3.8961e-08	5230910	1.1157e-07	0.522161	0.0325506	0.0904522	1.68098	2090930	5.06788e-07
3.5829	0.491307	3.5829	0.176381	3.00251	0.618923	5.58292	0.835413	5323600	2.16374e-07	5323600	1.74408e-07	15833800	3.89666e-08	5281110	1.11529e-07	0.527085	0.0374422	0.110553	1.72245	2111030	5.10323e-07
3.59798	0.489587	3.59798	0.192772	3.01206	0.619549	5.59799	0.79283	5373350	2.15151e-07	5373350	1.74251e-07	15984500	3.89676e-08	5331310	1.11492e-07	0.53201	0.0429864	0.130653	1.75263	2131120	5.13685e-07
3.61305	0.487741	3.61305	0.210255	3.02161	0.620126	5.61307	0.750341	5423100	2.13793e-07	5423100	1.74024e-07	16135200	3.8964e-08	5381510	1.11458e-07	0.536935	0.0492567	0.150754	1.77333	2151220	5.16862e-07
3.62813	0.485772	3.62813	0.228852	3.03115	0.620655	5.62815	0.708161	5472850	2.12307e-07	5472850	1.73728e-07	16285900	3.89558e-08	5431710	1.11427e-07	0.541859	0.0563331	0.170854	1.78619	2171310	5.1984e-07
3.6432	0.483684	3.64321	0.24858	3.0407	0.621138	5.64322	0.666492	5522600	2.10701e-07	5522600	1.73368e-07	16436600	3.8943e-08	5481910	1.11398e-07	0.546784	0.0643015	0.190955	1.79247	2191410	5.22606e-07
3.65828	0.481479	3.65828	0.26945	3.05025	0.621576	5.6583	0.625521	5572350	2.08985e-07	5572340	1.72946e-07	16587300	3.89257e-08	5532110	1.11372e-07	0.551708	0.0732547	0.211055	1.79293	2211500	5.25145e-07
3.67335	0.479161	3.67336	0.291466	3.0598	0.62197	5.67337	0.585421	5622090	2.07167e-07	5622090	1.72465e-07	16738000	3.89038e-08	5582310	1.11348e-07	0.556633	0.0832921	0.231156	1.78774	2231600	5.27442e-07
3.68843	0.476733	3.68843	0.314623	3.06935	0.622321	5.68845	0.546347	5671840	2.05255e-07	5671840	1.71928e-07	16888700	3.88774e-08	5632520	1.11325e-07	0.561558	0.0945198	0.251256	1.77655	2251700	5.29482e-07
3.7035	0.474198	3.70351	0.338912	3.07889	0.622631	5.70352	0.508437	5721590	2.03257e-07	5721590	1.71337e-07	17039400	3.88466e-08	5682720	1.11303e-07	0.566482	0.107051	0.271357	1.75853	2271790	5.31249e-07
3.71858	0.471559	3.71858	0.364312	3.08844	0.622901	5.7186	0.471811	5771340	2.0118e-07	5771340	1.70696e-07	17190200	3.88115e-08	5732920	1.11282e-07	0.571407	0.121005	0.291457	1.73256	2291890	5.32727e-07
3.73366	0.468821	3.73366	0.390794	3.09799	0.623133	5.73367	0.436573	5821090	1.99034e-07	5821090	1.70008e-07	17340900	3.87721e-08	5783120	1.11262e-07	0.576331	0.136508	0.311558	1.69728	2311980	5.33901e-07
3.74873	0.465986	3.74873	0.418321	3.10754	0.623328	5.74875	0.402808	5870840	1.96824e-07	5870840	1.69274e-07	17491600	3.87285e-08	5833320	1.11241e-07	0.581256	0.153692	0.331658	1.65133	2332080	5.34755e-07
3.76381	0.463058	3.76381	0.446844	3.11708	0.623488	5.76382	0.370582	5920590	1.94559e-07	5920590	1.68498e-07	17642300	3.86808e-08	5883520	1.1122e-07	0.586181	0.172696	0.351759	1.59346	2352170	5.35272e-07
3.77888	0.460041	3.77888	0.476306	3.12663	0.623613	5.7789	0.339947	5970330	1.92245e-07	5970330	1.67683e-07	17793000	3.86292e-08	5933720	1.11197e-07	0.591105	0.193664	0.371859	1.52271	2372270	5.35439e-07
3.79396	0.456936	3.79396	0.506638	3.13618	0.623706	5.79397	0.310938	6020080	1.89889e-07	6020080	1.66831e-07	17943700	3.85738e-08	5983920	1.11174e-07	0.59603	0.216742	0.39196	1.43866	2392360	5.35241e-07
3.80903	0.453749	3.80903	0.537764	3.14573	0.623766	5.80905	0.283574	6069830	1.87496e-07	6069830	1.65945e-07	18094400	3.85147e-08	6034120	1.11148e-07	0.600955	0.242085	0.41206	1.34156	2412460	5.34663e-07
3.82411	0.450482	3.82411	0.569594	3.15527	0.623796	5.82412	0.257859	6119580	1.85073e-07	6119580	1.65026e-07	18245100	3.8452e-08	6084320	1.11119e-07	0.605879	0.269848	0.432161	1.23249	2432550	5.33693e-07
3.83918	0.447138	3.83918	0.602031	3.16482	0.623796	5.8392	0.233786	6169330	1.82624e-07	6169330	1.64078e-07	18395800	3.83859e-08	6134520	1.11087e-07	0.610804	0.300187	0.452261	1.1135	2452650	5.32318e-07
3.85426	0.44372	3.85426	0.634966	3.17437	0.623766	5.85428	0.211334	6219080	1.80155e-07	6219080	1.63102e-07	18546500	3.83164e-08	6184730	1.11052e-07	0.615728	0.333263	0.472362	0.987501	2472750	5.30527e-07
3.86933	0.440232	3.86933	0.668284	3.18392	0.623707	5.86935	0.190471	6268830	1.77669e-07	6268830	1.621e-07	18697200	3.82439e-08	6234930	1.11012e-07	0.620653	0.369232	0.492462	0.858165	2492840	5.28311e-07
3.88441	0.436677	3.88441	0.701858	3.19346	0.623619	5.88443	0.171156	6318580	1.75172e-07	6318570	1.61075e-07	18847900	3.81683e-08	6285130	1.10968e-07	0.625578	0.408253	0.512563	0.729572	2512940	5.25661e-07
3.89948	0.433057	3.89948	0.735556	3.20301	0.623502	5.8995	0.15334	6368320	1.72667e-07	6368320	1.60029e-07	18998600	3.80899e-08	6335330	1.10918e-07	0.630502	0.450476	0.532663	0.605846	2533030	5.22571e-07
3.91456	0.429376	3.91456	0.769237	3.21256	0.623355	5.91458	0.136966	6418070	1.70157e-07	6418070	1.58962e-07	19149300	3.80087e-08	6385530	1.10862e-07	0.635427	0.496051	0.552764	0.490732	2553130	5.19034e-07
3.92963	0.425636	3.92964	0.802755	3.22211	0.623177	5.92965	0.121973	6467820	1.67645e-07	6467820	1.57877e-07	19300000	3.79249e-08	6435730	1.10799e-07	0.640351	0.545118	0.572864	0.387227	2573220	5.15047e-07
3.94471	0.421839	3.94471	0.835957	3.23166	0.622969	5.94473	0.108293	6517570	1.65134e-07	6517570	1.56774e-07	19450700	3.78386e-08	6485930	1.10729e-07	0.645276	0.597808	0.592965	0.297331	2593320	5.10608e-07
3.95978	0.417988	3.95979	0.86869	3.2412	0.622727	5.9598	0.0958572	6567320	1.62626e-07	6567320	1.55657e-07	19601400	3.775e-08	6536130	1.10651e-07	0.650201	0.654242	0.613065	0.221941	2613410	5.05717e-07
3.97486	0.414086	3.97486	0.900793	3.25075	0.622451	5.97488	0.0845919	6617070	1.60122e-07	6617070	1.54525e-07	19752100	3.76591e-08	6586330	1.10565e-07	0.655125	0.714527	0.633166	0.160911	2633510	5.00375e-07
3.98993	0.410134	3.98994	0.932108	3.2603	0.622139	5.98995	0.0744237	6666820	1.57624e-07	6666810	1.53379e-07	19902800	3.7566e-08	6636530	1.10469e-07	0.66005	0.778753	0.653266	0.113228	2653600	4.94587e-07
4.00501	0.406136	4.00501	0.962475	3.26985	0.621787	6.00503	0.0652785	6716560	1.55134e-07	6716560	1.52222e-07	20053500	3.74708e-08	6686740	1.10363e-07	0.664975	0.846994	0.673367	0.0772794	2673700	4.88358e-07
4.02008	0.402092	4.02009	0.991736	3.27939	0.621394	6.0201	0.0570826	6766310	1.52651e-07	6766310	1.51053e-07	20204200	3.73736e-08	6736940	1.10247e-07	0.669899	0.919303	0.693467	0.0511288	2693800	4.81695e-07
4.03516	0.398005	4.03516	1.01974	3.28894	0.620956	6.03518	0.0497634	6816060	1.50178e-07	6816060	1.49873e-07	20354900	3.72744e-08	6787140	1.10119e-07	0.674824	0.99571	0.713568	0.0327754	2713890	4.74608e-07
4.05023	0.393876	4.05024	1.04632	3.29849	0.62047	6.05025	0.0432502	6865810	1.47714e-07	6865810	1.48684e-07	20505600	3.71733e-08	6837340	1.09979e-07	0.679748	1.07622	0.733668	0.0203481	2733990	4.67108e-07
4.06531	0.389707	4.06531	1.07135	3.30804	0.619931	6.06533	0.0374746	6915560	1.4526e-07	6915560	1.47485e-07	20656300	3.70702e-08	6887540	1.09826e-07	0.684673	1.16081	0.753769	0.0122302	2754080	4.5921e-07
4.08038	0.3855	4.08039	1.09468	3.31758	0.619336	6.08041	0.0323712	6965310	1.42815e-07	6965310	1.46277e-07	20807000	3.69652e-08	6937740	1.0966e-07	0.689598	1.24943	0.773869	0.00711423	2774180	4.50927e-07
4.09546	0.381255	4.09546	1.11618	3.32713	0.618681	6.09548	0.0278774	7015060	1.4038e-07	7015050	1.4506e-07	20957700	3.68583e-08	6987940	1.09479e-07	0.694522	1.34199	0.79397	0.00400391	2794270	4.42278e-07
4.11053	0.376975	4.11054	1.13573	3.33668	0.617959	6.11056	0.0239342	7064800	1.37954e-07	7064800	1.43834e-07	21108400	3.67494e-08	7038140	1.09283e-07	0.699447	1.43838	0.81407	0.00217964	2814370	4.3328e-07
4.12561	0.372659	4.12561	1.15323	3.34623	0.617167	6.12563	0.0204862	7114550	1.35537e-07	7114550	1.426e-07	21259100	3.66384e-08	7088340	1.09071e-07	0.704371	1.53845	0.834171	0.00114744	2834460	4.23954e-07
4.14069	0.36831	4.14069	1.16856	3.35577	0.616299	6.14071	0.0174816	7164300	1.33128e-07	7164300	1.41357e-07	21409800	3.65253e-08	7138540	1.08842e-07	0.709296	1.64201	0.854271	0.000584011	2854560	4.14321e-07
4.15576	0.363927	4.15576	1.18165	3.36532	0.615348	6.15578	0.0148725	7214050	1.30727e-07	7214050	1.40106e-07	21560500	3.641e-08	7188750	1.08596e-07	0.714221	1.74884	0.874372	0.000287323	2874650	4.04406e-07
4.17084	0.359513	4.17084	1.19243	3.37487	0.61431	6.17086	0.0126145	7263800	1.28333e-07	7263800	1.38846e-07	21711200	3.62924e-08	7238950	1.08331e-07	0.719145	1.85867	0.894472	0.000136614	2894750	3.94231e-07
4.18591	0.355066	4.18591	1.20083	3.38442	0.613178	6.18593	0.0106672	7313550	1.25945e-07	7313550	1.37577e-07	21861900	3.61722e-08	7289150	1.08047e-07	0.72407	1.97121	0.914573	6.27643e-05	2914850	3.83822e-07
4.20099	0.350588	4.20099	1.20681	3.39397	0.611945	6.20101	0.00899338	7363300	1.23563e-07	7363290	1.36298e-07	22012600	3.60494e-08	7339350	1.07743e-07	0.728994	2.08612	0.934673	2.7858e-05	2934940	3.73206e-07
4.21606	0.346079	4.21607	1.21035	3.40351	0.610606	6.21608	0.0075596	7413040	1.21187e-07	7413040	1.35009e-07	22163300	3.59238e-08	7389550	1.07418e-07	0.733919	2.20301	0.954774	1.19435e-05	2955040	3.6241e-07
4.23114	0.34154	4.23114	1.21142	3.41306	0.609153	6.23116	0.00633556	7462790	1.18815e-07	7462790	1.3371e-07	22314000	3.5795e-08	7439750	1.07072e-07	0.738844	2.32149	0.974874	4.94521e-06	2975130	3.5146e-07
4.24621	0.336971	4.24622	1.21002	3.42261	0.607579	6.24623	0.00529407	7512540	1.16446e-07	7512540	1.32401e-07	22464800	3.56631e-08	7489950	1.06703e-07	0.743768	2.4411	0.994975	1.97714e-06	2995230	3.40386e-07
4.26129	0.332372	4.26129	1.20618	3.43216	0.605879	6.26131	0.00441085	7562290	1.14081e-07	7562290	1.31079e-07	22615500	3.55275e-08	7540150	1.0631e-07	0.748693	2.56137	1.01508	7.63163e-07	3015320	3.29215e-07
4.27636	0.327743	4.27637	1.19993	3.4417	0.604045	6.27638	0.0036643	7612040	1.1172e-07	7612040	1.29746e-07	22766200	3.53883e-08	7590350	1.05893e-07	0.753618	2.68178	1.03518	2.84352e-07	3035420	3.17976e-07
4.29144	0.323085	4.29144	1.1913	3.45125	0.602069	6.29146	0.00303536	7661790	1.0936e-07	7661790	1.284e-07	22916900	3.52449e-08	7640550	1.05452e-07	0.758542	2.8018	1.05528	1.02255e-07	3055510	3.06698e-07
4.30651	0.318397	4.30652	1.18035	3.4608	0.599947	6.30653	0.0025072	7711540	1.07003e-07	7711530	1.27041e-07	23067600	3.50972e-08	7690760	1.04984e-07	0.763467	2.92087	1.07538	3.54838e-08	3075610	2.95407e-07
4.32159	0.313681	4.32159	1.16716	3.47035	0.59767	6.32161	0.00206511	7761280	1.04648e-07	7761280	1.25667e-07	23218300	3.49448e-08	7740960	1.0449e-07	0.768391	3.0384	1.09548	1.18803e-08	3095700	2.84132e-07
4.33666	0.308935	4.33667	1.1518	3.47989	0.595232	6.33669	0.00169623	7811030	1.02295e-07	7811030	1.24279e-07	23369000	3.47874e-08	7791160	1.03968e-07	0.773316	3.15379	1.11558	3.83717e-09	3115800	2.72899e-07
4.35174	0.30416	4.35174	1.13437	3.48944	0.592627	6.35176	0.00138941	7860780	9.99442e-08	7860780	1.22875e-07	23519700	3.46248e-08	7841360	1.03418e-07	0.778241	3.26643	1.13568	1.19539e-09	3135900	2.61735e-07
4.36681	0.299356	4.36682	1.11498	3.49899	0.589849	6.36684	0.001135	7910530	9.75953e-08	7910530	1.21454e-07	23670400	3.44564e-08	7891560	1.0284e-07	0.783165	3.37571	1.15578	3.59137e-10	3155990	2.50666e-07
4.38189	0.294524	4.38189	1.09373	3.50854	0.586892	6.38191	0.000924688	7960280	9.52488e-08	7960280	1.20017e-07	23821100	3.42821e-08	7941760	1.02232e-07	0.78809	3.48101	1.17588	1.04039e-10	3176090	2.39716e-07
4.39696	0.289664	4.39697	1.07076	3.51808	0.583749	6.39699	0.000751363	8010030	9.29052e-08	8010030	1.18562e-07	23971800	3.41014e-08	7991960	1.01593e-07	0.793014	3.58171	1.19598	2.90577e-11	3196180	2.28908e-07
4.41204	0.284776	4.41204	1.04617	3.52763	0.580417	6.41206	0.000608943	8059780	9.05649e-08	8059780	1.17089e-07	24122500	3.3914e-08	8042160	1.00924e-07	0.797939	3.6772	1.21608	7.82324e-12	3216280	2.18264e-07
4.42711	0.27986	4.42712	1.02012	3.53718	0.576889	6.42714	0.000492261	8109520	8.82286e-08	8109520	1.15596e-07	24273200	3.37196e-08	8092360	1.00224e-07	0.802864	3.76691	1.23618	2.03009e-12	3236370	2.07805e-07
4.44219	0.274918	4.44219	0.992732	3.54673	0.573161	6.44221	0.00039694	8159270	8.5897e-08	8159270	1.14084e-07	24423900	3.35177e-08	8142560	9.94914e-08	0.807788	3.85026	1.25628	5.07683e-13	3256470	1.9755e-07
4.45726	0.26995	4.45727	0.964155	3.55628	0.569229	6.45729	0.000319291	8209020	8.35711e-08	8209020	1.12551e-07	24574600	3.33081e-08	8192760	9.87266e-08	0.812713	3.92671	1.27638	1.22337e-13	3276560	1.87518e-07
4.47234	0.264956	4.47235	0.934533	3.56582	0.56509	6.47236	0.000256212	8258770	8.12519e-08	8258770	1.10998e-07	24725300	3.30904e-08	8242970	9.7929e-08	0.817638	3.99576	1.29648	2.84029e-14	3296660	1.77725e-07
4.48741	0.259938	4.48742	0.904011	3.57537	0.56074	6.48744	0.00020511	8308520	7.89405e-08	8308520	1.09424e-07	24876000	3.28643e-08	8293170	9.70983e-08	0.822562	4.05693	1.31658	6.3526e-15	3316750	1.68185e-07
4.50249	0.254897	4.5025	0.872735	3.58492	0.556176	6.50251	0.000163819	8358270	7.66381e-08	8358270	1.07829e-07	25026700	3.26294e-08	8343370	9.62341e-08	0.827487	4.10981	1.33668	1.3686e-15	3336850	1.58912e-07
4.51756	0.249834	4.51757	0.84085	3.59447	0.551396	6.51759	0.000130544	8408020	7.43462e-08	8408020	1.06211e-07	25177400	3.23855e-08	8393570	9.53362e-08	0.832411	4.15401	1.35678	2.83983e-16	3356950	1.49918e-07
4.53264	0.24475	4.53265	0.8085	3.60401	0.546399	6.53266	0.000103797	8457760	7.20661e-08	8457760	1.04572e-07	25328100	3.21323e-08	8443770	9.44045e-08	0.837336	4.18921	1.37688	5.67481e-17	3377040	1.41212e-07
4.54771	0.239647	4.54772	0.775824	3.61356	0.541184	6.54774	8.23499e-05	8507510	6.97995e-08	8507510	1.02911e-07	25478800	3.18695e-08	8493970	9.3439e-08	0.842261	4.21515	1.39698	1.09197e-17	3397140	1.32803e-07
4.56279	0.234528	4.5628	0.742961	3.62311	0.535751	6.56282	6.51948e-05	8557260	6.75478e-08	8557260	1.01228e-07	25629500	3.15968e-08	8544170	9.24395e-08	0.847185	4.23162	1.41709	2.02317e-18	3417230	1.24697e-07
4.57787	0.229393	4.57787	0.710042	3.63266	0.530098	6.57789	5.15052e-05	8607010	6.53129e-08	8607010	9.95236e-08	25780200	3.1314e-08	8594370	9.14062e-08	0.85211	4.23848	1.43719	3.60891e-19	3437330	1.169e-07
4.59294	0.224245	4.59295	0.677195	3.6422	0.524229	6.59297	4.06062e-05	8656760	6.30965e-08	8656760	9.77972e-08	25930900	3.1021e-08	8644570	9.03394e-08	0.857034	4.23565	1.45729	6.19735e-20	3457420	1.09416e-07
4.60802	0.219087	4.60802	0.64454	3.65175	0.518143	6.60804	3.19486e-05	8706510	6.09003e-08	8706510	9.60497e-08	26081600	3.07176e-08	8694780	8.92391e-08	0.861959	4.22312	1.47739	1.02444e-20	3477520	1.02246e-07
4.62309	0.213921	4.6231	0.612194	3.6613	0.511844	6.62312	2.50866e-05	8756260	5.87263e-08	8756260	9.42814e-08	26232300	3.04035e-08	8744980	8.81059e-08	0.866884	4.20094	1.49749	1.62999e-21	3497610	9.53923e-08
4.63817	0.208749	4.63817	0.580264	3.67085	0.505334	6.63819	1.96595e-05	8806000	5.65763e-08	8806000	9.24929e-08	26383000	3.00788e-08	8795180	8.69401e-08	0.871808	4.16923	1.51759	2.49616e-22	3517710	8.88532e-08
4.65324	0.203576	4.65325	0.548851	3.68039	0.498617	6.65327	1.53763e-05	8855750	5.44522e-08	8855750	9.0685e-08	26533700	2.97433e-08	8845380	8.57423e-08	0.876733	4.12818	1.53769	3.67891e-23	3537800	8.26274e-08
4.66832	0.198403	4.66832	0.518047	3.68994	0.491697	6.66834	1.20029e-05	8905500	5.23559e-08	8905500	8.88584e-08	26684400	2.9397e-08	8895580	8.45131e-08	0.881657	4.07804	1.55779	5.2179e-24	3557900	7.67118e-08
4.68339	0.193235	4.6834	0.487939	3.69949	0.484579	6.68342	9.35136e-06	8955250	5.02893e-08	8955250	8.70141e-08	26835100	2.90399e-08	8945780	8.32533e-08	0.886582	4.01912	1.57789	7.12163e-25	3578000	7.11024e-08
4.69847	0.188074	4.69847	0.458601	3.70904	0.477267	6.69849	7.27146e-06	9005000	4.82543e-08	9005000	8.51532e-08	26985800	2.86721e-08	8995980	8.19638e-08	0.891507	3.9518	1.59799	9.35284e-26	3598090	6.5794e-08
4.71354	0.182924	4.71355	0.430104	3.71859	0.46977	6.71357	5.64318e-06	9054750	4.62527e-08	9054750	8.32768e-08	27136500	2.82935e-08	9046180	8.06453e-08	0.896431	3.87649	1.61809	1.18186e-26	3618190	6.07806e-08
4.72862	0.17779	4.72862	0.402506	3.72813	0.462092	6.72864	4.37094e-06	9104500	4.42864e-08	9104500	8.13862e-08	27287200	2.79043e-08	9096380	7.9299e-08	0.901356	3.79366	1.63819	1.4369e-27	3638280	5.60553e-08
4.74369	0.172674	4.7437	0.375859	3.73768	0.454242	6.74372	3.37884e-06	9154240	4.2357e-08	9154240	7.94829e-08	27438000	2.75047e-08	9146580	7.7926e-08	0.906281	3.70385	1.65829	1.68076e-28	3658380	5.16106e-08
4.75877	0.167582	4.75878	0.350207	3.74723	0.446227	6.75879	2.6067e-06	9203990	4.04663e-08	9203990	7.75684e-08	27588700	2.70948e-08	9196780	7.65275e-08	0.911205	3.6076	1.67839	1.89139e-29	3678470	4.74381e-08
4.77384	0.162517	4.77385	0.325585	3.75678	0.438056	6.77387	2.00694e-06	9253740	3.8616e-08	9253740	7.56443e-08	27739400	2.66749e-08	9246980	7.51048e-08	0.91613	3.50551	1.69849	2.04756e-30	3698570	4.3529e-08
4.78892	0.157483	4.78893	0.30202	3.76632	0.429738	6.78895	1.54198e-06	9303490	3.68074e-08	9303490	7.37123e-08	27890100	2.62452e-08	9297190	7.36592e-08	0.921054	3.39819	1.71859	2.13234e-31	3718660	3.98741e-08
4.80399	0.152485	4.804	0.279532	3.77587	0.421282	6.80402	1.18224e-06	9353240	3.50421e-08	9353240	7.17743e-08	28040800	2.58061e-08	9347390	7.21923e-08	0.925979	3.28628	1.73869	2.13611e-32	3738760	3.64636e-08
4.81907	0.147527	4.81908	0.258133	3.78542	0.412698	6.8191	9.04479e-07	9402990	3.33215e-08	9402990	6.9832e-08	28191500	2.53578e-08	9397590	7.07056e-08	0.930904	3.17045	1.75879	2.05837e-33	3758850	3.32875e-08
4.83414	0.142613	4.83415	0.237828	3.79497	0.403996	6.83417	6.90452e-07	9452740	3.16466e-08	9452740	6.78876e-08	28342200	2.49008e-08	9447790	6.92006e-08	0.935828	3.05134	1.77889	1.90785e-34	3778950	3.03356e-08
4.84922	0.137747	4.84923	0.218617	3.80451	0.395188	6.84925	5.25881e-07	9502480	3.00187e-08	9502480	6.5943e-08	28492900	2.44354e-08	9497990	6.76792e-08	0.940753	2.92963	1.79899	1.70086e-35	3799050	2.75976e-08
4.86429	0.132935	4.8643	0.200492	3.81406	0.386285	6.86432	3.99608e-07	9552230	2.84386e-08	9552230	6.40003e-08	28643600	2.39622e-08	9548190	6.6143e-08	0.945677	2.80597	1.8191	1.45844e-36	3819140	2.50631e-08
4.87937	0.12818	4.87938	0.183439	3.82361	0.377297	6.8794	3.02935e-07	9601980	2.69074e-08	9601980	6.20617e-08	28794300	2.34816e-08	9598390	6.45938e-08	0.950602	2.68101	1.8392	1.20279e-37	3839240	2.27216e-08
4.89444	0.123486	4.89445	0.167442	3.83316	0.368236	6.89447	2.29089e-07	9651730	2.54256e-08	9651730	6.01294e-08	28945000	2.29941e-08	9648590	6.30335e-08	0.955527	2.55539	1.8593	9.54032e-39	3859330	2.05627e-08
4.90952	0.118858	4.90953	0.152476	3.8427	0.359115	6.90955	1.72811e-07	9701480	2.39938e-08	9701480	5.82054e-08	29095700	2.25002e-08	9698790	6.14641e-08	0.960451	2.42972	1.8794	7.27775e-40	3879430	1.85762e-08
4.92459	0.1143	4.9246	0.138515	3.85225	0.349945	6.92462	1.30023e-07	9751230	2.26125e-08	9751230	5.62922e-08	29246400	2.20005e-08	9749000	5.98873e-08	0.965376	2.30457	1.8995	5.33927e-41	3899520	1.6752e-08
4.93967	0.109815	4.93968	0.125529	3.8618	0.340738	6.9397	9.75725e-08	9800980	2.1282e-08	9800980	5.43918e-08	29397100	2.14957e-08	9799200	5.83053e-08	0.970301	2.18052	1.9196	3.76712e-42	3919620	1.50801e-08
4.95474	0.105408	4.95475	0.113483	3.87135	0.331507	6.95477	7.3023e-08	9850720	2.00025e-08	9850720	5.25064e-08	29547800	2.09864e-08	9849400	5.67199e-08	0.975225	2.05806	1.9397	2.55606e-43	3939710	1.35509e-08
4.96982	0.101082	4.96983	0.102341	3.88089	0.322265	6.96985	5.44992e-08	9900470	1.87739e-08	9900470	5.06384e-08	29698500	2.04731e-08	9899600	5.51332e-08	0.98015	1.9377	1.9598	1.66785e-44	3959810	1.21549e-08
4.98489	0.0968398	4.9849	0.0920641	3.89044	0.313022	6.98492	4.05592e-08	9950220	1.75961e-08	9950220	4.87898e-08	29849200	1.99565e-08	9949800	5.35472e-08	0.985074	1.81987	1.9799	1.04655e-45	3979900	1.08832e-08
4.99997	0.0926857	4.99998	0.0826128	3.89999	0.303792	7	3.00975e-08	9999970	1.64688e-08	9999970	4.69628e-08	29999900	1.94373e-08	10000000	5.1964e-08	0.989999	1.70496	2	6.31504e-47	4000000	9.72706e-09
